# Supplementary material for: Highly sensitive and fast-response ethanol sensing of porous Co3O4 hollow polyhedra via palladium reined spillover effect
Source: Royal Society of Chemistry journal article supplement (doi:10.1039/d1ra09352e), 2022-01-01
Supplement: d1ra09352e1.pdf [file d1ra09352e1.pdf]

**Highly sensitive and fast-response ethanol sensing of porous Co<sub>3</sub>O<sub>4</sub> hollow polyhedra via palladium reined spillover effect**

*Guotao Yuan<sup>1</sup>, Yihong Zhong<sup>1</sup>, Yufeng Chen<sup>1</sup>, Qiqi Zhuo<sup>2,\*</sup> & Xuhui Sun<sup>1,\*</sup>*

<sup>1</sup>Institute of Functional Nano and Soft Materials Laboratory (FUNSOM), Soochow University, Suzhou 215123, China

<sup>2</sup>College of Material Science & Engineering, Jiangsu University of Science and Technology, Zhenjiang, China

\* Corresponding authors: Email: [zqq88263268@126.com](mailto:zqq88263268@126.com) (Q. Zhuo); [xhsun@suda.edu.cn](mailto:xhsun@suda.edu.cn) (X. Sun).

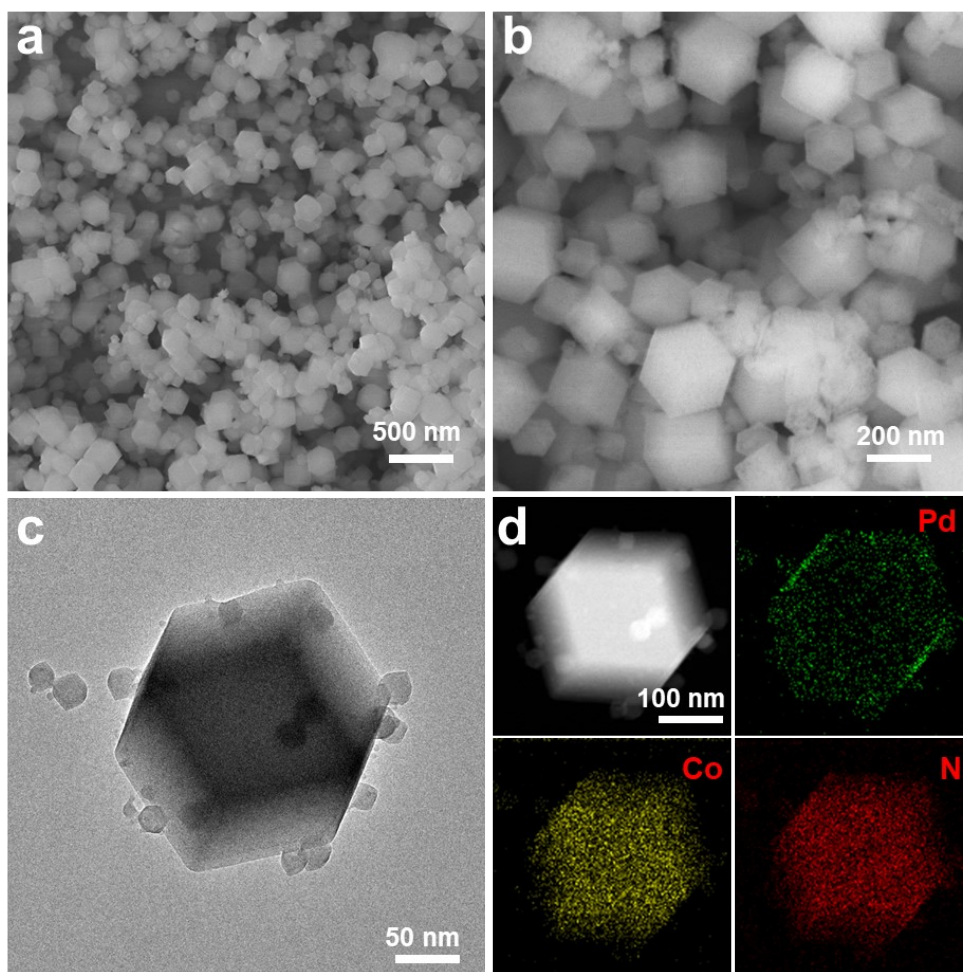

**Figure S1** (a) and (b) the SEM images of Pd-ZIF-67 with different magnifications; (c) TEM image and (d) corresponding EDX mappings of Pd, Co, and N elements

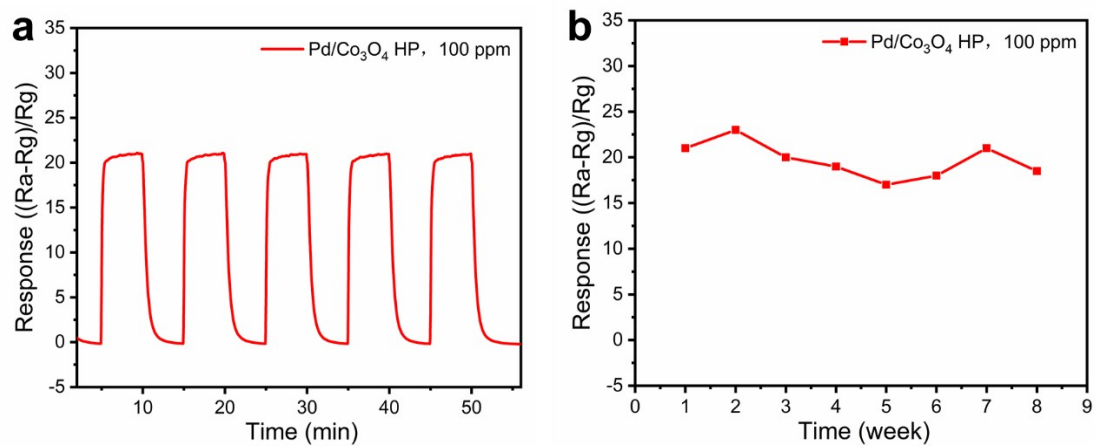

**Figure S2** The sensing stability tests. (a) the response transient cycles and (b) long-term stability testing curve of Pd/Co<sub>3</sub>O<sub>4</sub> HP sensor to 100 ppm of ethanol at 150 °C.

**Table S1** Gas sensing performances based on various nanostructures of  $\text{Co}_3\text{O}_4$  composites in literatures and the present work.

| Target gas | Materials                          | Morphology        | Temp. ( $^{\circ}\text{C}$ ) | Con. (ppm) | Res. ( $\text{Rg/Ra}$ ) | Res./Rec. times (s) | Ref       |
|------------|------------------------------------|-------------------|------------------------------|------------|-------------------------|---------------------|-----------|
| Ethanol    | $\text{Co}_3\text{O}_4$            | nanosheet         | 300                          |            | 57.7                    | 66/10               | [1]       |
|            | Cr/ $\text{Co}_3\text{O}_4$        | nanosheet         | 300                          |            | 24.6                    | 1/7                 | [2]       |
|            | $\text{Co}_3\text{O}_4/\text{CF}$  | flower            | 320                          |            | 4.2                     | 44/31               | [3]       |
|            | $\text{Co}_3\text{O}_4/\text{NCF}$ | nanosheet         | 100                          | 100        | 10.4                    | 45/140              | [4]       |
|            | $\text{ZnO}/\text{Co}_3\text{O}_4$ | microsphere       | 275                          |            | ~60                     | 5.6/29              | [5]       |
|            | Pd/ $\text{Co}_3\text{O}_4$        | Hollow polyhedral | 150                          |            | 21                      | 12/25               | This work |

## References

1. Choi, K.-I.; Kim, H.-R.; Kim, K.-M.; Liu, D.; Cao, G.; Lee, J.-H. *Sensors and Actuators B: Chemical* **2010**, 146, 183-189.
2. Zhang, P.; Wang, J.; Lv, X.; Zhang, H.; Sun, X. *Nanotechnology* **2015**, 26, 275501.
3. Li, L.; Liu, M.; He, S.; Chen, W. *Anal. Chem.* **2014**, 86, 7996-8002.
4. Li, L.; Zhang, C.; Zhang, R.; Gao, X.; He, S.; Liu, M.; Li, X.; Chen, W. *Sensors and Actuators B: Chemical* **2017**, 244, 664-672.
5. Qu, F.; Thomas, T.; Zhang, B.; Zhou, X.; Zhang, S.; Ruan, S.; Yang, M., *Sensors and Actuators B: Chemical* **2018**, 273, 1202-1210.
